# Supplementary material
Source: HighWire-hosted journal article supplement (http://www.ajnr.org/highwire/filestream/56121/field_highwire_adjunct_files/0/17-00428.pdf)
Supplement: 17-00428.pdf [file 17-00428.pdf]

**On-line Table: Hemangioblastomas and metastases according to magnetic strength<sup>a</sup>**

|                                | 1.5T                         |                       | 3T                           |                       |
|--------------------------------|------------------------------|-----------------------|------------------------------|-----------------------|
|                                | Hemangioblastomas<br>(n = 9) | Metastases<br>(n = 5) | Hemangioblastomas<br>(n = 7) | Metastases<br>(n = 2) |
| Size ratio                     | 1.22 (0.95–2.21)             | 0.72 (0.60–0.85)      | 1.52 (1.22–3.64)             | 0.89 (0.80, 0.98)     |
| Size on postcontrast TIWI (mm) | 12.27 (4.38–43.15)           | 20.66 (12.47–36.24)   | 7.16 (4.65–15.69)            | 29.75 (25.02–34.48)   |
| Size on CBF map (mm)           | 18.60 (7.20–46.27)           | 17.02 (8.87–25.88)    | 13.92 (6.75–19.15)           | 26.91 (20.12–33.70)   |
| rTBF                           | 8.32 (1.95–17.15)            | 3.56 (2.02–14.36)     | 5.19 (2.49–13.51)            | 2.16 (1.88–2.44)      |

<sup>a</sup>Data for size, rTBF, and size ratio are median values, and the numbers in parentheses are the lowest and highest values.
